# Supplementary material for: Intake of Koji Amazake Improves Defecation Frequency in Healthy Adults
Source: MDPI journal article supplement (doi:10.3390/jof7090782), 2021-09-21
Supplement: s1 [file s1]

**Table S2.** Illumina MiSeq sequencing information summary

| Time point | Num. of sample | Total count | Mean   | SD    | Max    | Min    |
|------------|----------------|-------------|--------|-------|--------|--------|
| 0w         | 44             | 672,457     | 15,283 | 3,890 | 24,479 | 10,338 |
| 3w         |                | 2,034,436   | 46,237 | 9,036 | 77,124 | 31,283 |
| 5w         |                | 2,172,504   | 49,375 | 6,759 | 74,864 | 34,688 |

SD, standard deviation; Max, maximum: Min minimum.
