# Supplementary material for: Intake of Koji Amazake Improves Defecation Frequency in Healthy Adults
Source: MDPI journal article supplement (doi:10.3390/jof7090782), 2021-09-21
Supplement: s1 [file s1]

**Table S1.** Background characteristics of the subjects

| Item                                 | Observed value, means $\pm$ SD |                  |
|--------------------------------------|--------------------------------|------------------|
|                                      | <i>Koji amazake</i> n=22       | Placebo n=22     |
| Gender (male/female)                 | 9/13                           | 9/13             |
| Age (years)                          | 38.8 $\pm$ 14.0                | 40.6 $\pm$ 14.0  |
| Height (cm)                          | 165.3 $\pm$ 8.7                | 165.0 $\pm$ 9.9  |
| Body weight (kg)                     | 57.3 $\pm$ 10.0                | 57.7 $\pm$ 6.8   |
| Body mass index (kg/m <sup>2</sup> ) | 20.9 $\pm$ 2.6                 | 21.1 $\pm$ 1.9   |
| Systolic blood pressure (mmHg)       | 110.9 $\pm$ 13.9               | 112.0 $\pm$ 12.9 |
| Triglyceride (mg/dL)                 | 78.4 $\pm$ 39.6                | 82.9 $\pm$ 29.2  |
| Fasting blood glucose level (mg/dL)  | 88.8 $\pm$ 8.7                 | 91.0 $\pm$ 7.6   |
| Hemoglobin A1c (%)                   | 5.33 $\pm$ 0.28                | 5.38 $\pm$ 0.32  |
| Weekly defecation days (days)        | 3.95 $\pm$ 1.02                | 4.00 $\pm$ 1.04  |
| Weekly defecation frequency (times)  | 4.68 $\pm$ 1.55                | 4.73 $\pm$ 1.63  |
